# Supplementary material
Source: publisher site journal article supplement (https://www.dovepress.com/article/544825)
Supplement: Supplementary file 1 [file Supplementary%20file.docx]

**Supplementary file 1: Interview guide**

| **Interview guide for TB Multi-Morbidity patients/Family members** |
| --- |
| 1. What do you know about TB and its treatment?  2. Probe: mode of transmission, duration, facilities – public and private |
| 3. Can you tell me about other health conditions you are managing along with TB, and how long it has been? (Ask for tenure of multiple conditions) |
| 4. How do you usually get information about your health conditions? |
| 5. How do you prefer to get information about your health? |
| 6. Probes: talking with healthcare providers, reading written materials, using online resources, or getting help from family members |
| 7. Can you describe a recent instance where you received health information related to TB and other chronic diseases? |
| 8. Probes: Clarity of information, if no, any specific areas where you feel information is lacking, complexity of medical terms, conflicting advice, language, how did you overcome this difficulty, or what steps did you take to address it? |
| 9. How did cultural beliefs, social norms make an impact on your understanding/following of health information? |
| 10. How do you navigate the healthcare system, such as scheduling appointments, understanding insurance coverage, or accessing NPY benefits? |
| 11. Probes: In what ways does this impact your treatment, and how do factors like the accessibility of healthcare services and the quality of communication with healthcare providers play a role. |
| 12. Can you describe your interactions with healthcare professionals during your treatment process? How often do these interactions occur, and what are the typical reasons for them? |
| 13. How would you describe your overall experience in communicating with healthcare professionals? Do you feel that your questions or concerns are adequately addressed during these interactions? |
| 14. Have healthcare professionals provided you with any educational materials to support your treatment? What types of materials have you received, such as pamphlets, brochures, or other resources? |
| 15. What do you think, what kind of resources could be available in the community that could improve knowledge? (Probe: - Additional counselling, Youth club, TB supporter, PRI members, TB Mitra) |
| 16. Do you make your decisions about where to treat, what medication to take? (Probe -Private and govt). If no, who is involved with you in decision-making? (Probe: - healthcare provider, relative, friend) |
| 17. Do you negotiate with doctors about treatment procedure and cost? (Probe: -Home remedies, alternative medicines, cost of medicines). |
| 18. What improvements would you suggest for enhancing knowledge for patients like you |
| 19. Is there anything else you would like to share about your experiences with managing TB and multiple comorbidities? |
| 20. Do you have any questions or feedback? |
| **Interview guide for healthcare professionals** |
| 1. Could you please describe your role and responsibilities within your healthcare practice? |
| 2. How long have you been working in this role, and what types of patients do you typically deal with? |
| 1. What information’s you usually provide to the TB Multi-Morbidity patients? (Probe: - counselling topics) And what is the delivery mode of information (e.g, verbal communication, written materials, digital tools)? |
| 2. What strategies do you adopt to ensure that patients understand the information provided? (Probe: - Teach back method) |
| 3. How did you identify the patient’s struggle to understand information, and address this comprehension? |
| 1. Do you face difficulties in simplifying complex medical information for patients? What specific aspects are challenging? |
| 2. How do you assist patients if they face changes while navigating the healthcare system? (e.g, Scheduling, insurance, accessing resources)? |
| 3. Who is specifically responsible for communicating and collaborating regarding patient education? Are there any barriers in communication among the professionals? |
| 1. What resources are available to you for supporting patient education? (Probe: digital tool, online resources). Is it sufficient? If no, what additional resources would be helpful in improving patient understanding and adherence? |
| 2. Have you received training related to providing comprehensive care/information to improve the patient-provider relationship? |
| 1. What changes could be made to enhance the effectiveness of patient education? |
| 2. How can the healthcare system support better healthcare professionals in addressing the health literacy issue? What recommendation do you have? |
| 3.Is there anything else you would like to share about your experience with health literacy and patient education? |

Supplementary file 2: COREQ (Consolidated criteria for Reporting Qualitative research) Checklist

| **Section/Topic** | **Item No** | **Checklist item** | **Reported on page No** |
| --- | --- | --- | --- |
| **Domain 1: Research team and reﬂexivity** | | | |
| Personal Characteristics | | | |
| *Interviewer/facilitator* | 1 | Which author/s conducted the interview or focus group?Interviewer/facilitator | Page 6 |
| *Credentials* | 2 | What were the researcher’s credentials? E.g. PhD, MD | Page 8 |
| *Occupation* | 3 | What was their occupation at the time of the study? | Page 8 |
| *Gender* | 4 | Was the researcher male or female? | Page 1 |
| *Experience and training* | 5 | What experience or training did the researcher have? Relationship with participants | Page 7 |
| Relationship with participants | | | |
| *Relationship established* | 6 | Was a relationship established prior to study commencement? | 5 & 6 |
| *Participant knowledge of the interviewer* | 7 | What did the participants know about the researcher? e.g. personal goals, reasons for doing the research | 5 & 6 |
| *Interviewer characteristics* | 8 | What characteristics were reported about the interviewer/facilitator? e.g. Bias, assumptions, reasons and interests in the research topic | 5 & 6 |
| **Domain 2: study design** | | | |
| Theoretical framework | | | |
| *Methodological orientation and*  *Theory* | 9 | What methodological orientation was stated to underpin the study? e.g. grounded theory, discourse analysis, ethnography, phenomenology, content analysis | 7 |
| Participant selection | | | |
| *Sampling* | 10 | How were participants selected? e.g. purposive, convenience, consecutive, snowball | 6 & 7 |
| *Method of approach* | 11 | How were participants approached? e.g. face-to-face, telephone, mail, email | 6 & 7 |
| *Sample size* | 12 | How many participants were in the study? | 6 & 7 |
| *Non-participation* | 13 | How many people refused to participate or dropped out? Reasons? | 6 & 7 |
| *Setting of data collection* | 14 | Where was the data collected? e.g. home, clinic, workplace | 6 & 7 |
| *Presence of non-participants* | 15 | Was anyone else present besides the participants and researchers? | 6 & 7 |
| *Description of sample* | 16 | What are the important characteristics of the sample? e.g. demographic data, date | 6 & 7 |
| Data collection | | | |
| *Interview guide* | 17 | Were questions, prompts, guides provided by the authors? Was it pilot tested? | 7 |
| *Repeat interviews* | 18 | Were repeat interviews carried out? If yes, how many? |  |
| *Audio/visual recording* | 19 | Did the research use audio or visual recording to collect the data? | 7 |
| *Field notes* | 20 | Were ﬁeld notes made during and/or after the interview or focus group? | 7 |
| *Duration* | 21 | What was the duration of the interviews or focus group? | 7 |
| *Data saturation* | 22 | Was data saturation discussed? | 7 & 8 |
| *Transcripts returned* | 23 | Were transcripts returned to participants for comment and/or correction? | 8 |
| Domain 3: analysis and ﬁndingsz  Data analysis | | | |
| *Number of data coders* | 24 | How many data coders coded the data? | 7 |
| *Description of the coding tree* | 25 | Did authors provide a description of the coding tree? | 19 & 20 |
| *Derivation of themes* | 26 | Were themes identiﬁed in advance or derived from the data? | 9-18 |
| *Software* | 27 | What software, if applicable, was used to manage the data? | 7 |
| *Participant checking* | 28 | Did participants provide feedback on the ﬁndings? | 8 |
| Reporting | | | |
| *Quotations presented* | 29 | Were participant quotations presented to illustrate the themes / ﬁndings? Was each quotation identiﬁed? e.g. participant number | 9-18 |
| *Data and ﬁndings consistent* | 30 | Was there consistency between the data presented and the ﬁndings? | 9-18 |
| *Clarity of major themes* | 31 | Were major themes clearly presented in the ﬁndings? | 9-18 |
| *Clarity of minor themes* | 32 | Is there a description of diverse cases or discussion of minor themes? | 9-18 |
